## SEROTONIN DIFFERENTIALLY MODULATES TWO $K^+$ CURRENTS IN THE RETZIUS CELL OF THE LEECH

BY JUAN ACOSTA-URQUIDI\*, CHRISTIE L. SAHLEY  
AND ANNA L. KLEINHAUS†

Department of Neurology, Yale University School of Medicine, 333 Cedar Street,  
New Haven, CT 06510, USA and Department of Biology, Yale University,  
PO Box 6666, New Haven, CT 06511, USA

Accepted 8 May 1989

### Summary

The effects of  $100 \mu\text{mol l}^{-1}$  serotonin (5-HT) were investigated on the  $\text{Na}^+$ - and  $\text{Ca}^{2+}$ -dependent action potential and distinct  $K^+$  currents in the Retzius (R) cells of the hirudinid leeches *Macrobdella decora* and *Hirudo medicinalis* by conventional current-clamp and two-microelectrode voltage-clamp techniques.

1. In normal  $\text{Na}^+$ -containing Ringer, 5-HT decreased the duration of the action potential prolonged by  $5 \text{ mmol l}^{-1}$  tetraethylammonium ( $\text{TEA}^+$ ) chloride.

2. In  $\text{Na}^+$ -free saline containing  $25 \mu\text{mol l}^{-1}$   $\text{TEA}^+$  to block  $I_K$ , 5-HT reduced the amplitude and duration of  $\text{Ca}^{2+}$  spikes evoked by intracellular current injection.

3. Under voltage-clamp, 5-HT enhanced the peak amplitude of an early transient 4-aminopyridine (4-AP)-sensitive, voltage-dependent outward current, termed  $I_A$ . A small but significant increase in the time constant of inactivation ( $\tau_{\text{off}}$ ) of  $I_A$  was also measured after exposure to 5-HT.

4. 5-HT suppressed the peak and steady-state amplitudes of a delayed  $\text{TEA}^+$ -sensitive, voltage-dependent outward current, termed  $I_K$ .

These results demonstrate differential simultaneous modulation of distinct  $K^+$  currents in the Retzius cell of the leech by the endogenous transmitter serotonin. These cells contain and release 5-HT, and are believed to be multifunction neurons implicated in feeding and swimming. This modulation may change the excitable properties of the cell, leading to a negative feedback autoregulation of its transmitter output.

### Introduction

There is a large body of work on the role played by serotonin in the modulation

\* Present address: Department of Biology, Western Washington University, Bellingham, WA 98225, USA.

† To whom correspondence should be addressed.

of complex behavior in vertebrates (Jacobs & Gelperin, 1981) as well as invertebrates (Beltz & Kravitz, 1986; Evans & Myers, 1986; Harris-Warrick & Flamm, 1986; Mackey & Carew, 1983). At the cell membrane level, 5-HT has been most intensively studied in molluscan neurons by means of microelectrode voltage-clamp and patch-clamp techniques. These studies have shown that 5-HT exerts a multitude of modulatory effects on distinct ionic conductances (Acosta-Urquidi, 1986; Benson & Levitan, 1983; Crow & Bridge, 1985; Deterre *et al.* 1982; Ewald & Eckert, 1983; Jacklet & Acosta-Urquidi, 1985; Lemos & Levitan, 1984; Paupardin-Tritsch *et al.* 1986; Pellmar, 1984; Siegelbaum *et al.* 1982; Walsh & Byrne, 1984). However, the functional significance of the modulation has been established in only a few cases (Farley & Auerbach, 1986; Kandel & Schwartz, 1982; Klein *et al.* 1982; Pollock *et al.* 1985).

In the nervous system of the leech, 5-HT is localized in a limited number of neurons (Kerkut & Walker, 1967; Lent, 1982; Lent *et al.* 1979; Rude, 1969), but there is a growing body of evidence suggesting that serotonin can modulate transmission at central and peripheral synapses, with important functional consequences (Belardetti *et al.* 1982; Mason *et al.* 1979; McGlade-McCulloh, 1984). The bilateral pair of Retzius cells contain the largest concentration of 5-HT (Lent *et al.* 1979; McAdoo & Coggeshall, 1976; McCaman *et al.* 1973). These cells are believed to be multifunction neurons playing an important role in the control of essential behavior, such as feeding (Lent & Dickinson, 1984; Lent, 1985) and swimming (Kristan & Nusbaum, 1983; Willard, 1981) as well as affecting mucus release from the skin (Lent, 1973) and the relaxation of body wall musculature (Mason *et al.* 1979; for a review, see Leake, 1986). Most known actions of Retzius cells can be mimicked by 5-HT applied in the vicinity of presumed targets. It is therefore believed the cells' functions are largely exerted through release of this transmitter into the hemolymph. Moreover, the spontaneous activity of the Retzius cell is inhibited by short applications of 5-HT, presumably *via* extrasynaptic autoreceptors located on the neuronal soma (Kerkut & Walker, 1967). This inhibitory response has been attributed to an increase in chloride conductance (Walker & Smith, 1973) and is thought to desensitize rapidly (Kerkut & Walker, 1967). A similar rapidly desensitizing hyperpolarizing response can be evoked in another neuron, the mechanosensory cell responsive to pressure (P), by focal application of 5-HT or by R cell stimulation (Henderson, 1983; Drapeau & Sanchez-Armass, 1988). In the course of investigating the role of 5-HT in the sensitization of a defensive reflex, we observed changes in the shape of the action potential of the Retzius cell which persisted for several minutes after exposure to 5-HT. Although the properties of the 5-HT receptors in the R and P cells may not be identical, there is some evidence suggesting that they are similar, and hence that the 5-HT-induced increase in  $\text{Cl}^-$  conductance may desensitize rapidly in the R cell as well (P. Drapeau, personal communication). The persistent spike-modulating effects of 5-HT on the R cell therefore suggested to us that some other mechanism might be responsible. There have been no reports on the effects of 5-HT on the soma spike and its underlying conductances in the R cell. We

therefore undertook to analyze this effect further by means of conventional two-electrode voltage-clamp techniques.

We report for the first time in the leech, that 5-HT reduces the amplitude and duration of a  $Ca^{2+}$  spike recorded in  $Na^+$ -free saline, and that these changes are accompanied by the differential modulation of two distinct voltage-dependent  $K^+$  currents; 5-HT enhanced the early transient outward  $K^+$  current,  $I_A$ , and suppressed the delayed  $K^+$  current,  $I_K$ . Although there is no direct proof that 5-HT regulates the activity of the R cell, Fuchs *et al.* (1982) have shown that the release of 5-HT from R cells in culture is reduced by hyperpolarizing current injection. Furthermore, Nusbaum & Kristan (1986) suggested that inhibition of R cells by 5-HT might be a mechanism by which a swimming episode is terminated. The modulation of the  $K^+$  current in the R cell by 5-HT described in this study might, therefore, be one of the contributing mechanisms by which the Retzius cell titrates the amount of transmitter it releases. A preliminary account of these findings has been reported (Kleinhaus *et al.* 1988).

### Materials and methods

Specimens of the hirudinid leeches *Macrobdella decora* and *Hirudo medicinalis* were obtained from commercial suppliers (St Croix Biological, Minnesota and Biopharm Ltd, Charleston, SC) and kept in distilled water with  $0.5\text{ g l}^{-1}$  of dissolved Instant Ocean at  $5^\circ\text{C}$ . 48 leeches were used in this study. Individual segmental ganglia were dissected in leech saline containing (in  $\text{mmol l}^{-1}$ ): NaCl, 120; KCl, 4;  $CaCl_2$ , 2; Tris-HCl, 10 or Hepes, 10; adjusted to pH 7.4 with either NaOH or HCl, as previously described (Nicholls & Baylor, 1968; Kleinhaus, 1976, 1980). After separation from the body, the ganglia were pinned to a Sylgard (Dow Corning) coated dish and the connective capsule overlying the neurons was removed by microdissection. Desheathing exposed the neurons, removed diffusion barriers and increased the yield of successful impalements. In this study we used the Retzius cells, which in *Macrobdella* are the largest neurons ( $50\text{--}80\text{ }\mu\text{m}$  in diameter) situated on the ventral side of the ganglia. They could be unambiguously identified on the basis of their size, position and firing properties (Keyzer & Lent, 1977; Muller *et al.* 1981; Nicholls & Baylor, 1968).

For voltage-clamp experiments, no attempt was made to isolate the soma by axonal ligation, as somatic  $K^+$  currents in intact cells were indistinguishable from those recorded from ligated Retzius cells (Johansen & Kleinhaus, 1986). Micro-electrodes were pulled from thin-walled borosilicate glass tubing (1 mm omega-dot, F. Haer) on a Brown-Flaming P-80 puller (Sutter Instr. Co.) and filled with either  $3\text{ mol l}^{-1}$  KCl ( $10\text{--}20\text{ M}\Omega$ ) or  $4\text{ mol l}^{-1}$  potassium acetate ( $20\text{--}30\text{ M}\Omega$ ). Conventional two-electrode voltage-clamp techniques were employed by using either a Dagan 8500 amplifier (Dagan Corp.) or an Axoclamp 2-A amplifier system (Axon Instruments Inc., Burlingame, CA). Most experiments used the Axoclamp 2-A (time constant  $0.2\text{ ms}$ , gain approx.  $800\text{ V V}^{-1}$ ,  $0.3\text{ kHz}$  output bandwidth, settling time approx.  $2\text{ ms}$ ). Membrane currents in the Dagan amplifier were

measured by a virtual ground circuit connected to a AgCl pellet immersed in the bath. In the Axoclamp the current injected across the feedback resistor in the headstage was sampled for membrane current measurement. Current-voltage ( $I$ - $V$ ) relationships for the specific  $K^+$  current studied were generated by standardized pulse protocols and were obtained before and at various times after the addition of 5-HT. The signals were photographed directly from a storage oscilloscope, recorded on a penwriter (Gould Brush 220 or Hewlett Packard 7402A) and stored for analysis on an IBM-PC computer system interfaced with a Tecmar Labmaster A-D converter which digitized traces at 32 kHz using the appropriate software (pClamp, Axon Instruments Inc., Burlingame, CA). After off-line subtraction of leakage and capacitative currents, the data were reproduced on a digital plotter (Hewlett-Packard 7470A). Tests of significance were made using Student's  $t$ -test for paired correlated samples. Action potential duration (in ms) was compared in the control condition with the 5-HT condition for each cell. Likewise, currents (in nA) in the presence and absence of 5-HT were compared for each cell.

$Na^+$ - and  $Ca^{2+}$ -free solutions were prepared by substituting sucrose for  $Na^+$  and  $Mn^{2+}$  for  $Ca^{2+}$ . The outward currents  $I_A$  and  $I_K$  were separated pharmacologically with tetraethylammonium ( $TEA^+$ ) chloride (Aldrich) and 4-aminopyridine (4-AP) (Aldrich), as previously described (Johansen & Kleinhaus, 1986). 5-HT (creatinine sulfate complex, Sigma) was made up as a  $10\text{ mmol l}^{-1}$  stock solution and stored in the freezer. On experimental days samples were diluted in the appropriate saline to the final desired concentration. The volume of the experimental chamber was approximately 1.0 ml and at least 5–10 ml of a drug-containing solution was perfused onto the preparation before testing its effect. All experiments were carried out at room temperature (20–24°C).

## Results

### *Effect of 5-HT on the action potential*

In our initial experiments, using normal Ringer, we confirmed that 5-HT caused a reversible hyperpolarization accompanied by a slowing of the spontaneous firing rate of the Retzius cell, as described by others (for a review, see Leake, 1986). Interestingly, the firing frequency recovered only partially several (12–15) minutes following drug washout. Along with the change in firing rate, we also observed that 5-HT caused a small reduction in the duration of the action potential. Alterations in the shape of the action potential produced by 5-HT have been reported in *Aplysia californica* (Klein *et al.* 1982) and in the chick dorsal root ganglion (DRG) (Dunlap & Fischbach, 1981). However, in these preparations, the small effect produced by 5-HT observed in normal saline could be dramatically enhanced when the action potential was prolonged by  $TEA^+$ , which blocks the repolarizing potassium current.

Since  $TEA^+$  prolongs the action potential of the Retzius cell (Kleinhaus & Prichard, 1975), we examined the effect of 5-HT on the action potential of Retzius

cells in the presence of  $TEA^+$ . In normal saline, and in the presence of  $5 \text{ mmol l}^{-1}$   $TEA^+$ , bath application of  $100 \mu\text{mol l}^{-1}$  5-HT produced a  $76 \pm 8\%$  decrease in duration of the action potential: control,  $25.5 \pm 6 \text{ ms}$   $N = 7$ ; 5-HT,  $5.1 \pm 1.2 \text{ ms}$   $N = 7$ ;  $P < 0.01$ . In contrast, the upstroke of the action potential was not significantly altered (maximum rate of depolarization: control,  $20 \text{ mV}$ ,  $1.9 \pm 0.46 \text{ ms}$ ; 5-HT,  $20 \text{ mV}$ ,  $1.8 \pm 0.37 \text{ ms}$ ;  $t(4) = 0.874$ ,  $P = 0.57$ ), indicating that 5-HT did not affect the  $Na^+$  current. The shortening of the action potential observed under these conditions might therefore result from a decrease in the  $Ca^{2+}$  current underlying the plateau or from changes in the repolarizing  $K^+$  conductance(s).

In the R cells of the leech the upstroke of the action potential is predominantly carried by  $I_{Na}$  (Kleinhaus & Prichard, 1976, 1983) but regenerative  $Ca^{2+}$  spikes in  $Na^+$ -free saline can be elicited when competing repolarizing outward currents are removed by  $K^+$  channel blockers (Kleinhaus & Prichard, 1975; Kleinhaus, 1976, 1980). We therefore re-examined the effect of 5-HT on a  $Ca^{2+}$ -dependent action potential in the absence of  $Na^+$ .

Fig. 1A illustrates the effect of 5-HT on the  $Ca^{2+}$  spike recorded from a Retzius cell in  $Na^+$ -free saline containing  $25 \text{ mmol l}^{-1}$   $TEA^+$ . Under these conditions the delayed rectifier,  $I_K$ , was almost completely blocked and the  $Ca^{2+}$  spike duration

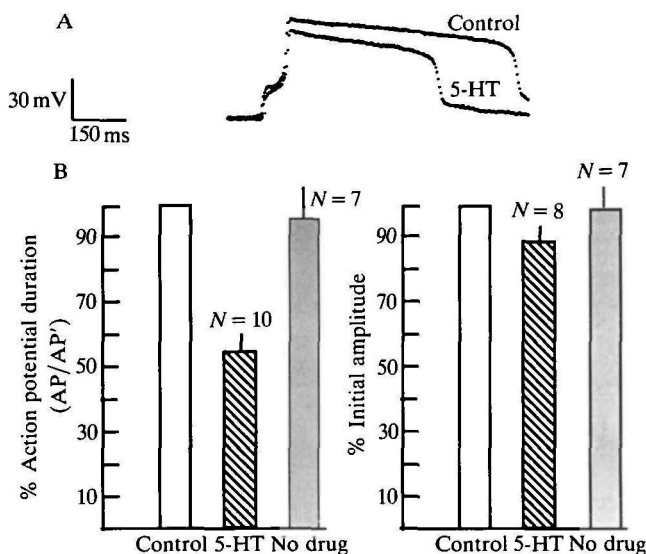

Fig. 1. Serotonin decreased the amplitude and duration of the  $Ca^{2+}$ -dependent action potential in Retzius cell. (A) A  $Ca^{2+}$ -dependent action potential evoked by depolarizing current injection ( $0.5\text{--}2 \text{ nA}$ ) in  $Na^+$ -free,  $5 \text{ mmol l}^{-1}$   $Ca^{2+}$ ,  $25 \text{ mmol l}^{-1}$   $TEA^+$  saline before (control) and after addition of  $100 \mu\text{mol l}^{-1}$  5-HT. Spike amplitude and duration were decreased by 13% and 40%, respectively, by 5-HT. (B) Graph from pooled data shows significant reduction in  $Ca^{2+}$  spike duration (left panel) and amplitude (right panel) in the presence of 5-HT (cross-hatched bar) compared with untreated cells stimulated for the same period of time (stippled bar/no drug).

varied between 0.5 and 1.0 s (Kleinhaus & Prichard, 1975). The cells were stimulated at 30 s intervals until the action potential duration stabilized (usually 3–5 min after impalement). Since membrane potential ( $V_M$ ) is important in controlling spike duration (a 5 mV reduction of  $V_M$  can increase spike duration by about 20%; A. L. Kleinhaus, unpublished observation), we held the membrane potential constant near  $-50$  mV by injection of direct current through the recording microelectrode. Measurements of action potential amplitude and duration were then made for 10 min and these values were used as controls. 5-HT ( $20$ – $100 \mu\text{mol l}^{-1}$ ) was subsequently added to the bath while the cell was continuously stimulated at the same rate. Between 5 and 10 min after the addition of 5-HT to the bath,  $\text{Ca}^{2+}$  spike amplitude and duration were both reduced (Fig. 1A). A comparison of the average duration of  $\text{Ca}^{2+}$  spikes recorded in R cells perfused with  $\text{Na}^+$ -free saline for at least 10 min with that of spikes recorded from R cells exposed to  $100 \mu\text{mol l}^{-1}$  5-HT for the same time, revealed that 5-HT reduced spike duration from an average of  $1152 \pm 230$  ms (S.E.M.) to  $633 \pm 167$  ms, a reduction of  $45 \pm 6\%$  [ $t(9) = 6.7$ ;  $P < 0.001$ ], and spike amplitude from  $62 \pm 6$  mV to  $55 \pm 5.7$  mV, an average reduction of  $11.3\%$  [ $t(7) = 6.3$ ;  $P < 0.001$ ]. These statistically significant changes are compared in Fig. 1B with measurements on a separate group of seven cells which were perfused for the same period with saline free of 5-HT, and where the spike changed in duration from  $1003 \pm 190$  ms to  $990 \pm 135$  ms [ $t(6) = 1.01$ ;  $P = 0.4$ ], and in amplitude to  $98 \pm 3\%$  of the initial value, showing that the changes recorded in the presence of 5-HT were not simply due to passage of time.

In molluscan giant neurons, alterations of spike duration by 5-HT have been related to modulation of  $\text{Ca}^{2+}$  and  $\text{K}^+$  conductances (Acosta-Urquidi, 1986; Deterre *et al.* 1982; Klein *et al.* 1982; Paupardin-Tritsch *et al.* 1986). Under the experimental conditions of Fig. 1, the action potential resulted from the flow of  $\text{Ca}^{2+}$  and  $\text{K}^+$  exclusively, since there was no  $\text{Na}^+$  present in the saline. Therefore, a reduction of spike amplitude and duration could result either from a decrease in inward  $\text{Ca}^{2+}$  current or from an increase in outward  $\text{K}^+$  current(s). Voltage-clamp experiments were undertaken in an attempt to establish which ionic conductances were affected by 5-HT in the  $\text{TEA}^+$ -prolonged action potential.

#### *Effects of 5-HT on calcium current*

When  $I_K$  and  $I_A$  are blocked in a  $\text{Na}^+$ -free solution, R cells can sustain action potentials carried by either  $\text{Ca}^{2+}$ ,  $\text{Sr}^{2+}$  or  $\text{Ba}^{2+}$  and which can be blocked by  $\text{Mn}^{2+}$  (Kleinhaus, 1976). Under these conditions, a voltage-dependent inward divalent cation current can be recorded under voltage-clamp in the R cell (A. L. Kleinhaus, unpublished observation). We examined the effect of 5-HT on  $I_{\text{Ca}}$  in eight cells and did not observe a significant effect on this current,  $t(7) = 1.4$ ,  $P = 0.2$ .  $I_{\text{Ca}}$  was evoked from a holding potential ( $V_H$ ) of  $-40$  mV with voltage steps to  $0$  mV. 5-HT increased the  $\text{Ca}^{2+}$  current on average by  $1.2 \pm 0.9$  nA. This increase represents a  $7.4 \pm 7.8\%$  difference. However, of the eight cells none showed a decrease in  $I_{\text{Ca}}$  following treatment with 5-HT. The variability of the response may have been due

in part to the incomplete block of all  $K^+$  currents by  $TEA^+$  and 4-AP. Among the possible candidates are a  $TEA^+$ -resistant  $I_{K(Ca)}$  and/or a 'residual background' current with ranges of activation which overlap with  $I_{Ca}$ . Such currents may be present in varying proportions in different preparations and therefore complicate the analysis of the effect of 5-HT on  $I_{Ca}$ . However, although the experiments were inconclusive, they did not support the hypothesis that the reduction of  $Ca^{2+}$  spike amplitude and duration seen in current-clamp recordings resulted from a decrease in  $I_{Ca}$ . Therefore, it appeared that 5-HT might shorten the amplitude and duration of the  $Ca^{2+}$  spike by enhancing outward repolarizing  $K^+$  current(s).

#### *Effects of 5-HT on outward currents*

The voltage-sensitive outward currents in the Retzius cells of *Macrobdella* consist of at least two distinct components with different voltage dependence and activation-inactivation kinetics. Furthermore, the two  $K^+$  currents can be distinguished by their selective sensitivity to  $K^+$  channel blockers (one is blocked by 4-AP and the other by  $TEA^+$ ). By analogy with similar currents in other preparations, these have been termed  $I_A$  and  $I_K$ , respectively (Johansen & Kleinhaus, 1986).

#### $I_A$

$I_A$  can be distinguished from  $I_K$  by its faster activation-inactivation kinetics, its specific sensitivity to 4-AP block, and by the fact that it undergoes complete steady-state inactivation at a  $V_H$  of about  $-30$  mV. For these experiments  $V_H$  was set at  $-80$  mV and command voltage steps to elicit  $I_A$  were kept at or below  $0$  mV to minimize the possible contribution of a small  $TEA^+$ -resistant fraction of  $I_K$ . There is potentially a substantial overlap of these two currents at  $V_M$  values more positive than  $0$  mV. In some experiments, an example of which is shown in Fig. 2,  $I_A$  was studied after blocking  $I_K$  with  $TEA^+$ . In this study, the range of magnitude for  $I_A$  evoked by a step to  $0$  mV from a  $V_H$  of  $-80$  mV was  $7$ – $24$  nA, and for the inactivation time constant ( $\tau_{off}$ ) the range was  $88$ – $160$  ms. Nonetheless, 5-HT consistently enhanced the peak amplitude of  $I_A$  in all Retzius cells studied by an average of  $9 \pm 1$  nA [ $t(8) = 6.5$ ,  $P < 0.001$ ]. This represents a  $108 \pm 37\%$  change. However, it appeared that if  $I_A$  was initially large, 5-HT produced only a small additional measurable enhancement. In contrast, if  $I_A$  was small initially, the 5-HT-induced enhancement was robust. The mean current for the control condition was  $12 \pm 2.3$  nA, whereas following 5-HT the mean current was  $21.6 \pm 2.7$  nA. Representative results for each case are illustrated in Figs 2 and 3, respectively. In the example of Fig. 3, a washout produced partial reversibility of the 5-HT effect, revealed by the complete  $I$ – $V$  activation plots before, during and after 5-HT application. We did not see reversibility of the enhancement of  $I_A$  in all cases. However, this result may have been biased because we were not always able to maintain the electrodes in the cell throughout the successive solution changes. When reversibility occurred, the time frame was similar to that of the return of the spontaneous rate of firing observed in normal Ringer under current-clamp. A

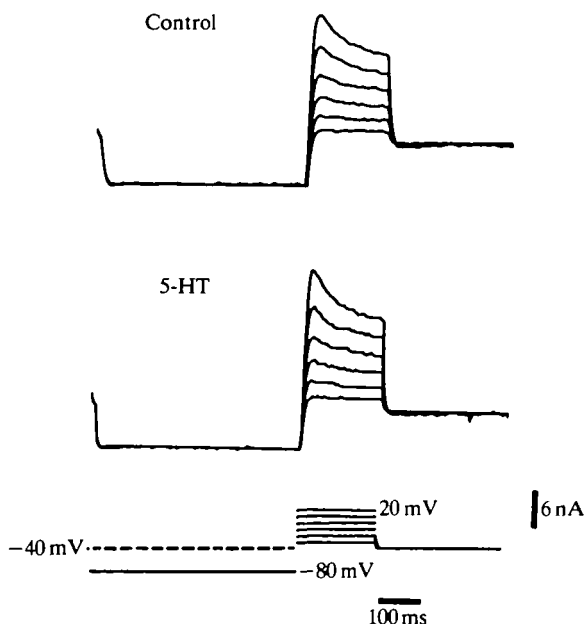

Fig. 2. Serotonin enhanced  $I_A$  in Retzius cell. A family of  $I_A$  current responses before (control) and 10 min after addition of  $100 \mu\text{mol l}^{-1}$  5-HT. Currents were evoked by 200 ms depolarizing steps in 10 mV increments, following a 500 ms conditioning prepulse to  $-80 \text{ mV}$  from a holding potential ( $V_H$ ) of  $-40 \text{ mV}$ . Saline was  $\text{Na}^+$ - and  $\text{Ca}^{2+}$ -free with  $25 \text{ mmol l}^{-1}$  TEA $^+$  added to remove  $I_K$  and  $I_{K(\text{Ca})}$  contamination. This example illustrates the smallest increase in  $I_A$  produced by 5-HT (approx. 11 % change at  $+20 \text{ mV}$ ) observed in this study. Current traces reproduced from stored digitized data. In these and all subsequent voltage-clamp records, upper traces are currents (calibration bar in nA), and lower traces show command voltage protocol. In this experiment leakage current was not subtracted from the records.

small but statistically significant increase in  $\tau_{\text{off}}$  was also measured [ $t(8) = 3.4$ ;  $P < 0.01$ ] in all the cells studied. In the control condition  $\tau_{\text{off}}$  was  $119.1 \pm 8 \text{ ms}$ , whereas in the presence of 5-HT it was  $129.1 \pm 8 \text{ ms}$ . On average we observed a  $9.3 \pm 2.7 \text{ ms}$  increase in  $\tau_{\text{off}}$  in the presence of 5-HT. This represents a  $8 \pm 2 \%$  change.

### $I_K$

Since the steady-state inactivation of  $I_A$  is complete at  $-30 \text{ mV}$ , we separated  $I_A$  from  $I_K$  by setting  $V_H$  between  $-30$  and  $-10 \text{ mV}$  and by adding  $3 \text{ mmol l}^{-1}$  4-AP to the saline. In contrast to its effect on  $I_A$ , 5-HT consistently suppressed the peak and steady-state amplitude of  $I_K$  in Retzius cells at all voltage steps in 10 of the 10 cells studied [ $t(9) = 4.4$ ;  $P < 0.002$ ]. Pooled data from the 10 cells indicated that  $I_K$  was reduced on average by  $15.7 \pm 3.6 \text{ nA}$  (control  $36.15 \pm 4 \text{ nA}$ ; 5-HT =  $20.45 \pm 4 \text{ nA}$ ). This represents a mean decrease of  $44 \pm 6 \%$  (Figs 4 & 5). This



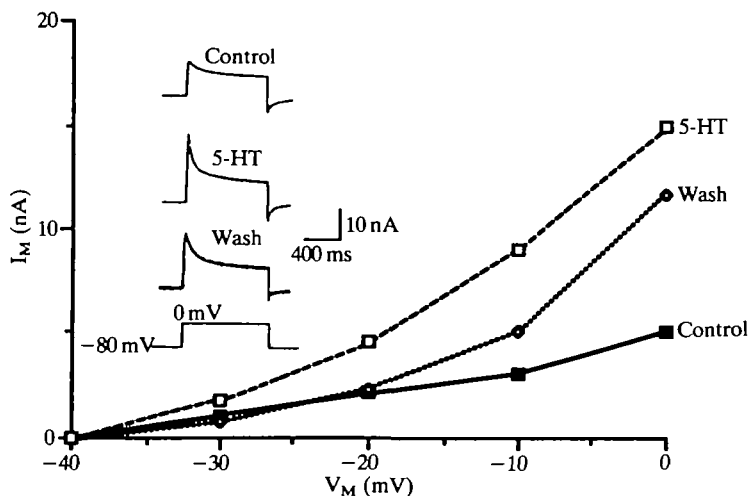

Fig. 3. Serotonin reversibly enhanced  $I_A$  in Retzius cell. Current-voltage ( $I$ - $V$ ) activation plot of peak  $I_A$  amplitude (leakage corrected) before (control), during (5-HT) and 20 min after washout. Current responses were evoked by command voltage steps in increments of 10 mV, 800 ms in duration from a  $V_H$  of  $-80$  mV. This experiment illustrates one of the largest serotonin-induced increases (380 % change at 0 mV) in  $I_A$  observed in this study. The inset shows sample  $I_A$  traces evoked at 0 mV, recorded with a penwriter.

effect was not readily reversible within the time course of our observations (10–20 min following drug removal).

### Discussion

Our results show that application of  $100 \mu\text{mol l}^{-1}$  5-HT reduced both the amplitude and the duration of Retzius cell  $\text{Ca}^{2+}$  spikes and differentially modulated two distinct voltage-dependent outward  $K^+$  currents:  $I_A$  was enhanced and  $I_K$  was suppressed.

#### *Action potential duration and amplitude*

Action potential duration and amplitude have been shown to be critical variables in the release of transmitter, since only small changes in action potential shape can produce dramatic changes in transmitter release (Jessell & Iversen, 1977; Kandel & Schwartz, 1982). The observed decrease in amplitude and duration of the  $\text{Ca}^{2+}$  spike caused by 5-HT would be expected to decrease the output of neurotransmitter from the Retzius cell. The simplest explanation for these effects of 5-HT is to attribute them to a reduction of  $I_{\text{Ca}}$ , as has been demonstrated in the DRG (Holz *et al.* 1986; Dunlap & Fischbach, 1981). Interestingly, Dunlap & Fischbach (1981) reported that 5-HT decreased the duration of spikes recorded from embryonic DRG cells in culture in the absence of  $\text{TEA}^+$ , and they attributed the effect to suppression of  $I_{\text{Ca}}$ . However, our

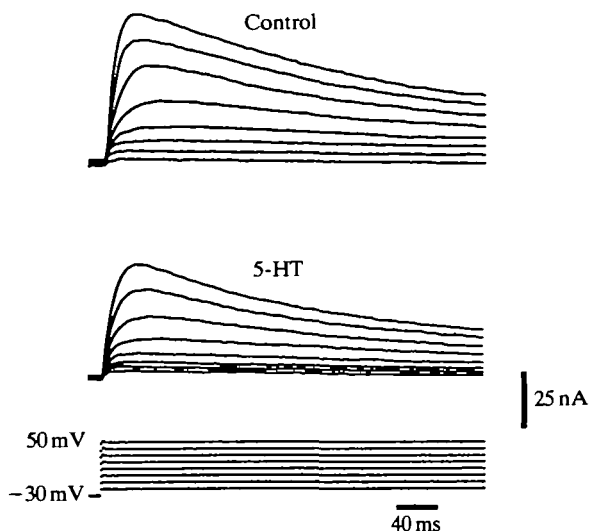

Fig. 4. Serotonin suppressed  $I_K$  in Retzius cell. A family of  $I_K$  currents evoked by 10 mV incrementing depolarizing steps from a  $V_H$  of  $-30$  mV in  $\text{Na}^+$ - and  $\text{Ca}^{2+}$ -free saline containing  $3 \text{ mmol l}^{-1}$  4-AP to remove contamination from  $I_A$  and  $I_{K(\text{Ca})}$ , before (control) and 10 min after adding  $100 \mu\text{mol l}^{-1}$  5-HT. This experiment illustrates a moderate serotonin-induced decrease in peak current (24 % change at  $+50$  mV). The traces are reproduced from digitized data after leakage and capacitive transients had been subtracted.

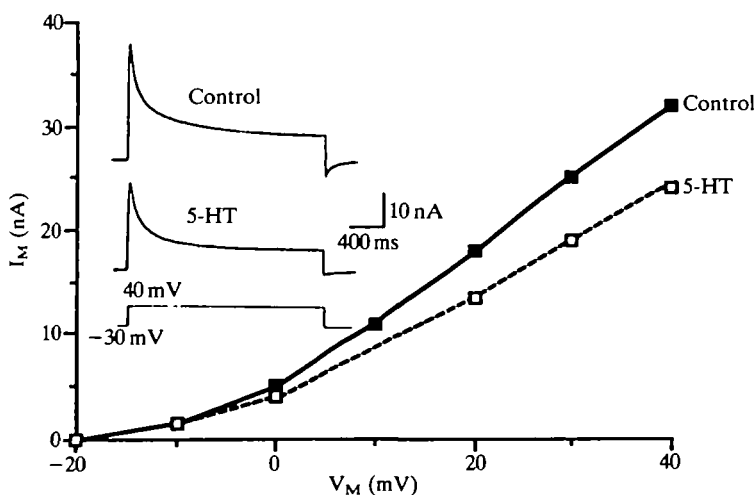

Fig. 5. Serotonin suppressed peak and steady-state components of  $I_K$  in Retzius cell. I-V plot of peak  $I_K$  current (leakage-corrected), before (control) and after 10 min of exposure to  $100 \mu\text{mol l}^{-1}$  5-HT. The inset shows sample  $I_K$  responses that have reached steady state (2 s pulse duration), recorded with a penwriter.

preliminary experiments indicated that, in the absence of  $I_K$  and  $I_A$ , 5-HT produced variable effects on  $I_{Ca}$  in the Retzius cell. Therefore, the 5-HT-induced reduction of the  $Ca^{2+}$  spike amplitude and duration recorded under current-clamp is more likely to be due to the enhancement of  $I_A$  by 5-HT. This conclusion is supported by the observation that, under these recording conditions, the spike repolarizing current is probably mostly  $I_A$ , since  $I_K$  was mostly blocked by  $25 \text{ mmol l}^{-1}$  TEA<sup>+</sup>, and resting potential values were about  $-50 \text{ mV}$ , at which voltage substantial  $I_A$  would still be available for activation.

### $I_A$

The results of this study show that 5-HT modulated (up-regulated)  $I_A$  in the Retzius cell. Modulation of  $I_A$  by 5-HT and other agents has been reported in a number of molluscan preparations. Suppression (down-regulation) of  $I_A$  by 5-HT and small cardioactive peptide B (SCP<sub>B</sub>) has been reported for *Hermisenda* identified giant neurons (Acosta-Urquidi, 1988) and by 5-HT for type B photoreceptors (Farley & Auerbach, 1986).

Treatments that elevate cyclic AMP levels (including injection of cyclic AMP, cyclic AMP analogues, forskolin and phosphodiesterase inhibitors) also suppress (down-regulate)  $I_A$  in *Aplysia* bag cells (Strong, 1984), Dorid neurons (Coombs & Thompson, 1987) and *Hermisenda* neurons (Acosta-Urquidi, 1985). These studies also reported additional complex changes in  $I_A$  kinetics of inactivation induced by the adenylate cyclase activator, forskolin. The decrease in  $I_A$  was related to changes in neuronal excitability, including increased firing rate and spike broadening.

By contrast, this study reports the first example of modulation of  $I_A$  by 5-HT in the leech Retzius cell, resulting in an increased conductance (up-regulation). This increase in  $I_A$  amplitude is accompanied by a small increase in the activation time constant of  $I_A$  ( $\tau_{\text{off}}$ ).

Examples of a 5-HT-induced increase in diverse potassium conductances *via* activation of cyclic-AMP-dependent pathways in identified molluscan neurons are numerous. In *Aplysia* cell R15, 5-HT enhances the anomalous rectifier (Benson & Levitan, 1983; Lemos & Levitan, 1984) and  $I_{K(\text{Ca})}$  (Ewald & Eckert, 1983) and in some *Hermisenda* neurons 5-HT enhances  $I_{K(\text{Ca})}$  (Jacklet & Acosta-Urquidi, 1985; Acosta-Urquidi, 1986). Enhanced  $I_A$  conductance could thus be due either to an increase in the opening probability of single channels, and/or to an increase in the single-channel conductance and/or the number of active channels. Recordings at the single-channel level will be required to distinguish between these mechanisms.

### $I_K$

The present study provides an example of a 5-HT-induced decrease of  $I_K$  in the leech Retzius cell. Suppression of  $I_K$  peak and steady-state current was not accompanied by any obvious changes in kinetics of inactivation. A number of studies on identified *Aplysia* neurons have demonstrated  $I_K$  modulation (down-

regulation and kinetic changes) by 5-HT and treatments that elevate intracellular cyclic AMP levels (Strong & Kaczmarek, 1986; Walsh & Byrne, 1984; Baxter & Byrne, 1986). In some *Hermisenda* giant neurons, 5-HT, SCP<sub>B</sub> and treatments that elevate intracellular cyclic AMP levels also suppress I<sub>K</sub> (Acosta-Urquidi, 1985, 1986, 1988). Serotonin has been reported to increase cyclic AMP levels in the nerve cord and muscle of the leech (Belardetti *et al.* 1982; McGlade-McCulloh, 1984). Although we have no direct evidence for the involvement of any internal messenger(s) in the mechanism by which 5-HT modulates I<sub>A</sub> and I<sub>K</sub> in the leech Retzius cells, the studies mentioned above suggest that such a mechanism may be operating in this animal as well. Further experiments are planned to explore this possibility.

### Functional significance

The significance of the simultaneous modulation of diverse K<sup>+</sup> currents by 5-HT in the leech Retzius cell is unclear. On the one hand, suppression of I<sub>K</sub> should promote spike broadening and an overall increase in cell excitability (Acosta-Urquidi, 1988; Klein *et al.* 1982, 1986). On the other hand, enhancement of I<sub>A</sub> might result in an increased spike threshold, increased spike adaptation and decreased spike duration. In current-clamp recordings we found that 5-HT shortened the duration of the Ca<sup>2+</sup> spike, suggesting that, under conditions of reduced I<sub>K</sub> current, I<sub>A</sub> may play a role in spike repolarization. Furthermore, 5-HT decreases the frequency of firing in R cells (Walker & Smith, 1973; Kerkut & Walker, 1967; Nusbaum & Kristan, 1986) which may result in part from the increase in I<sub>A</sub> current observed in this investigation. Modelling studies are planned to gain further insight into the precise interaction of the diverse K<sup>+</sup> conductances studied in this paper and the desensitizing Cl<sup>-</sup> conductance reported earlier (Kerkut & Walker, 1967; Walker & Smith, 1973), in the hope of determining the functional consequences of their modulation by serotonin.

We are grateful to Mr J. O'Connor for technical assistance. This work was supported in part by NIH grant NS-18054 and a grant from the Whitehall Foundation to ALK.

### References

- ACOSTA-URQUIDI, J. (1985). Calcium and cyclic AMP-mediated regulation of Ca<sup>2+</sup> and K<sup>+</sup>-currents in *Hermisenda* giant neurons. *Soc. Neurosci. Abstr.* **11**, 788.
- ACOSTA-URQUIDI, J. (1986). Modulation of Ca<sup>2+</sup> and K<sup>+</sup>-currents in giant *Hermisenda* neurons by the neuropeptide SCP<sub>B</sub> and serotonin. *Soc. Neurosci. Abstr.* **12**, 241.
- ACOSTA-URQUIDI, J. (1988). Modulation of calcium current and diverse K<sup>+</sup>-currents in identified *Hermisenda* neurons by small cardioactive peptide B. *J. Neurosci.* **8**, 1694–1703.
- BAXTER, D. A. & BYRNE, J. H. (1986). Serotonin-modulated membrane currents in *Aplysia* tail sensory neurons. *Soc. Neurosci. Abstr.* **12**, 765.
- BELARDETTI, F., BIONDI, C., COLOMBAIONI, L., BRUNELLI, M. & TREVISANI, A. (1982). Role of serotonin and cyclic AMP in facilitation of the fast conducting system activity in the leech *Hirudo medicinalis*. *Brain Res.* **246**, 89–103.
- BELTZ, B. S. & KRAVITZ, E. A. (1986). Aminergic and peptidergic neuromodulation in Crustacea. *J. exp. Biol.* **124**, 115–141.

- BENSON, J. & LEVITAN, I. (1983). Serotonin increases an anomalously rectifying  $K^+$ -current in *Aplysia* neuron R15. *Proc. natn. Acad. Sci. U.S.A.* **80**, 3522–3525.
- COOMBS, J. & THOMPSON, S. (1987). Forskolin's effect on transient  $K^+$  current in nudibranch neurons is not reproduced by cAMP. *J. Neurosci.* **7**, 443–452.
- CROW, T. & BRIDGE, M. S. (1985). Serotonin modulates photoresponses in *Hermisenda* Type-B photoreceptors. *Neurosci. Lett.* **60**, 83–88.
- DETERRE, P., PAUPARDIN-TRITSCH, D., BOCKAERT, J. & GERSCHENFELD, H. M. (1982). Cyclic AMP mediated decrease in  $K^+$ -conductance evoked by serotonin and dopamine in the same neuron: a biochemical and physiological single-cell study. *Proc. natn. Acad. Sci. U.S.A.* **79**, 7934–7938.
- DRAPEAU, P. & SANCHEZ-ARMASS, S. (1988). Selection of postsynaptic serotonin receptors during reinnervation of an identified leech neuron in culture. *J. Neurosci.* **8**, 4718–4727.
- DUNLAP, K. & FISCHBACH, D. (1981). Neurotransmitters decrease the calcium conductance activated by depolarization of embryonic chick sensory neuron. *J. Physiol., Lond.* **317**, 519–535.
- EVANS, P. D. & MYERS, C. M. (1986). Peptidergic and aminergic modulation of insect skeletal muscle. *J. exp. Biol.* **124**, 143–176.
- EDWALD, D. & ECKERT, R. (1983). Cyclic AMP enhances calcium dependent potassium current in *Aplysia* neurons. *Cell. molec. Neurobiol.* **3**, 345–353.
- FARLEY, J. & AUERBACH, S. (1986). Protein kinase C activation induces conductance changes in *Hermisenda* photoreceptors like those seen in associative learning. *Nature, Lond.* **319**, 220–223.
- FUCHS, P. A., HENDERSON, L. P. & NICHOLLS, J. G. (1982). Chemical transmission between individual Retzius and sensory neurones of the leech in culture. *J. Physiol., Lond.* **316**, 203–223.
- HARRIS-WARRICK, R. & FLAMM, R. E. (1986). Chemical modulation of a small central pattern generator circuit. *Trends Neurosci.* **9**, 432–437.
- HENDERSON, L. P. (1983). The role of 5-hydroxytryptamine as a transmitter between identified leech neurones in culture. *J. Physiol., Lond.* **339**, 309–324.
- HOLZ, G., SHEFNER, S. A. & ANDERSON, G. (1986). Serotonin decreases the duration of action potentials recorded from tetraethylammonium-treated bullfrog dorsal root ganglion cells. *J. Neurosci.* **6**, 620–626.
- JACKLET, J. & ACOSTA-URQUIDI, J. (1985). Serotonin decreases a background current and increases calcium and calcium-activated current in pedal neurons in *Hermisenda*. *Cell. molec. Neurobiol.* **5**, 407–412.
- JACOBS, B. L. & GELPERIN, A. (eds) (1981). *Serotonin: Neurotransmission and Behavior*. Cambridge, MA: MIT Press.
- JESSELL, T. M. & IVERSEN, L. L. (1977). Opiate analgesics inhibit substance P release from rat trigeminal nucleus. *Nature, Lond.* **268**, 549–551.
- JOHANSEN, J. & KLEINHAUS, A. L. (1986). Transient and delayed potassium currents in the Retzius cell of the leech, *Macrobdella decora*. *J. Neurophysiol.* **56**, 812–822.
- KANDEL, E. & SCHWARTZ, J. H. (1982). Molecular biology of learning: Modulation of transmitter release. *Science* **218**, 433–443.
- KERKUT, G. A. & WALKER, R. J. (1967). The action of acetylcholine, dopamine and 5-hydroxytryptamine on the spontaneous activity of the cells of Retzius of the leech *Hirudo medicinalis*. *Br. J. Pharmac. Chemother.* **30**, 644–654.
- KEYZER, K. T. & LENT, C. M. (1977). On neuronal homologies within the central nervous system of leeches. *Comp. Biochem. Physiol.* **58A**, 285–297.
- KLEIN, M., CAMARDO, J. & KANDEL, E. R. (1982). Serotonin modulates a specific potassium current in the sensory neurons that show presynaptic facilitation in *Aplysia*. *Proc. natn. Acad. Sci. U.S.A.* **79**, 5713–5717.
- KLEIN, M., HOCHNER, B. & KANDEL, E. (1986). Facilitatory transmitters and cAMP can modulate accommodation as well as transmitter release in *Aplysia* sensory neurons: Evidence for parallel processing in a single cell. *Neurobiology* **83**, 7994–7998.
- KLEINHAUS, A. L. (1976). Divalent cations and the action potential of the leech Retzius cell. *Pflügers Arch. ges. Physiol.* **363**, 97–104.

- KLEINHAUS, A. L. (1980). Segregation of leech neurons by the effect of sparteine on action potential duration. *J. Physiol., Lond.* **299**, 309–321.
- KLEINHAUS, A. L. & PRICHARD, J. W. (1975). Calcium dependent action potentials produced in leech Retzius cells by tetraethylammonium chloride. *J. Physiol., Lond.* **246**, 351–361.
- KLEINHAUS, A. L. & PRICHARD, J. W. (1976). Sodium-dependent tetrodotoxin-resistant action potentials in a leech neuron. *Brain Res.* **102**, 363–373.
- KLEINHAUS, A. L. & PRICHARD, J. W. (1979). Interaction of divalent cations and barbiturates on four identified leech neurons. *Comp. Biochem. Physiol.* **63C**, 351–357.
- KLEINHAUS, A. L. & PRICHARD, J. W. (1983). Differential action of tetrodotoxin on identified leech neurons. *Comp. Biochem. Physiol.* **74C**, 211–218.
- KLEINHAUS, A. L., SAHLEY, C. L. & ACOSTA-URQUIDI, J. (1988). Serotonin differentially modulates two  $K^+$ -currents in the leech Retzius cell. *Soc. Neurosci. Abstr.* **14**.
- KRISTAN, W. B., JR & NUSBAUM, M. P. (1983). The dual role of serotonin in leech swimming. *J. Physiol., Paris* **78**, 743–747.
- LEAKE, L. D. (1986). Leech Retzius cells and 5-hydroxytryptamine. *Comp. Biochem. Physiol.* **83C**, 229–239.
- LEMONS, J. R. & LEVITAN, I. B. (1984). Intracellular injection of guanyl nucleotides alters the serotonin-induced increase in potassium conductance in *Aplysia* neuron R15. *J. gen. Physiol.* **83**, 269–285.
- LENT, C. M. (1973). Retzius cells neuroeffectors controlling mucus release by the leech. *Science* **179**, 693–696.
- LENT, C. M. (1982). Serotonin-containing neurons within the segmental nervous system of the leech. In *The Biology of Serotonergic Transmission* (ed. N. N. Osborne), pp. 431–456. London: Wiley.
- LENT, C. M. (1985). Serotonergic modulation of the feeding behavior of the medicinal leech. *Brain Res. Bull.* **14**, 643–655.
- LENT, C. M. & DICKINSON, M. H. (1984). Serotonin integrates the feeding behavior of the medicinal leech. *J. comp. Physiol.* **154**, 457–471.
- LENT, C. M., ONO, J., KEYSER, K. T. & KARTEN, H. J. (1979). Identification of serotonin within vital-stained neurons from leech ganglia. *J. Neurochem.* **32**, 1559–1563.
- MCAADOO, D. J. & COGGESHALL, R. E. (1976). Gas chromatographic–mass spectrometric analysis of biogenic amines in identified neurons and tissues of *Hirudo medicinalis*. *J. Neurochem.* **26**, 163–167.
- MCCAMAN, M. W., WEINREICH, D. & MCCAMAN, R. E. (1973). The determination of picomole levels of 5-hydroxytryptamine and dopamine in *Aplysia*, *Tritonia* and leech nervous tissues. *Brain Res.* **53**, 129–137.
- MCGLADE-MCCULLOH, E. (1984). Serotonin's modulation of acetylcholine-induced contractures of the leech everter muscle: pre- and postsynaptic actions. PhD thesis, Carnegie Institution of Washington, Baltimore, Maryland, USA.
- MACKAY, S. & CAREW, T. J. (1983). Locomotion in *Aplysia*: triggering by serotonin and modulation by bag cell extract. *J. Neurosci.* **3**, 1469–1477.
- MASON, A., SUNDERLAND, A. J. & LEAKE, L. D. (1979). Effects of leech Retzius cells on body wall muscles. *Comp. Biochem. Physiol.* **63C**, 359–361.
- MULLER, K. J., NICHOLLS, J. G. & STENT, G. S. (eds) (1981). *Neurobiology of the Leech*. New York: Cold Harbor Spring Laboratory.
- NICHOLLS, J. G. & BAYLOR, D. A. (1968). Specific modalities and receptive fields of sensory neurones in the leech CNS. *J. Neurophysiol.* **31**, 740–756.
- NUSBAUM, M. P. & KRISTAN, W. B., JR (1986). Swim initiation in the leech by serotonin-containing neurones, cells 21 and 61. *J. exp. Biol.* **122**, 277–302.
- PAUPARDIN-TRITSCH, D., HAMMOND, C., GERSCHENFELD, H. M., NAIRN, A. C. & GREENGARD, P. (1986). cGMP-dependent protein kinase enhances  $Ca^{2+}$ -current and potentiates the serotonin-induced  $Ca^{2+}$ -current increase in snail neurones. *Nature, Lond.* **323**, 812–813.
- PELLMAR, T. (1984). Enhancement of inward current by serotonin in neurons of *Aplysia*. *J. Neurophysiol.* **15**, 13–25.
- POLLOCK, J. D., BERNIER, L. & CAMARDO, J. S. (1985). Serotonin and cyclic adenosine 3'5'-monophosphate modulate the potassium current in tail sensory neurons in the pleural ganglion of *Aplysia*. *J. Neurosci.* **5**, 1862–1871.

- RUDE, S. (1969). Monoamine-containing neurons in the central nervous system of the leech *Hirudo medicinalis*. *J. comp. Neurol.* **136**, 249–372.
- SIEGELBAUM, S. A., CAMARDO, J. S. & KANDEL, E. R. (1982). Serotonin and cyclic AMP close single  $K_p$  channels in *Aplysia* sensory neurones. *Nature, Lond.* **299**, 413–417.
- STRONG, J. A. (1984). Modulation of potassium current kinetics in bag cell neurons of *Aplysia* by an activator of adenylate cyclase. *J. Neurosci.* **4**, 2772–2783.
- STRONG, J. A. & KACZMAREK, L. K. (1986). Multiple components of delayed potassium current in peptidergic neurons of *Aplysia* modulation by an activator of adenylate cyclase. *J. Neurosci.* **6**, 814–822.
- WALKER, R. J. & SMITH, P. A. (1973). The ionic mechanism for 5-hydroxytryptamine inhibition on Retzius cells of the leech *Hirudo medicinalis*. *Comp. Biochem. Physiol.* **45A**, 979–993.
- WALSH, J. P. & BYRNE, J. H. (1984). Forskolin mimics and blocks a serotonin-sensitive decreased  $K^+$ -conductance in tail sensory neurons of *Aplysia*. *Neurosci. Lett.* **52**, 7–11.
- WILLARD, A. L. (1981). Effects of serotonin on the generation of the motor program for swimming by the medicinal leech. *J. Neurosci.* **1**, 936–944.
